# Supplementary material for: Influence of Chicken Manure Fertilization on Antibiotic-Resistant Bacteria in Soil and the Endophytic Bacteria of Pakchoi
Source: MDPI journal article supplement (doi:10.3390/ijerph13070662), 2016-06-30
Supplement: s1 [file s1]

# Supplementary Materials: Influence of Chicken Manure Fertilization on Antibiotic-Resistant Bacteria in Soil and the Endophytic Bacteria of Pakchoi

Qingxiang Yang, Hao Zhang, Yuhui Guo and Tiantian Tian

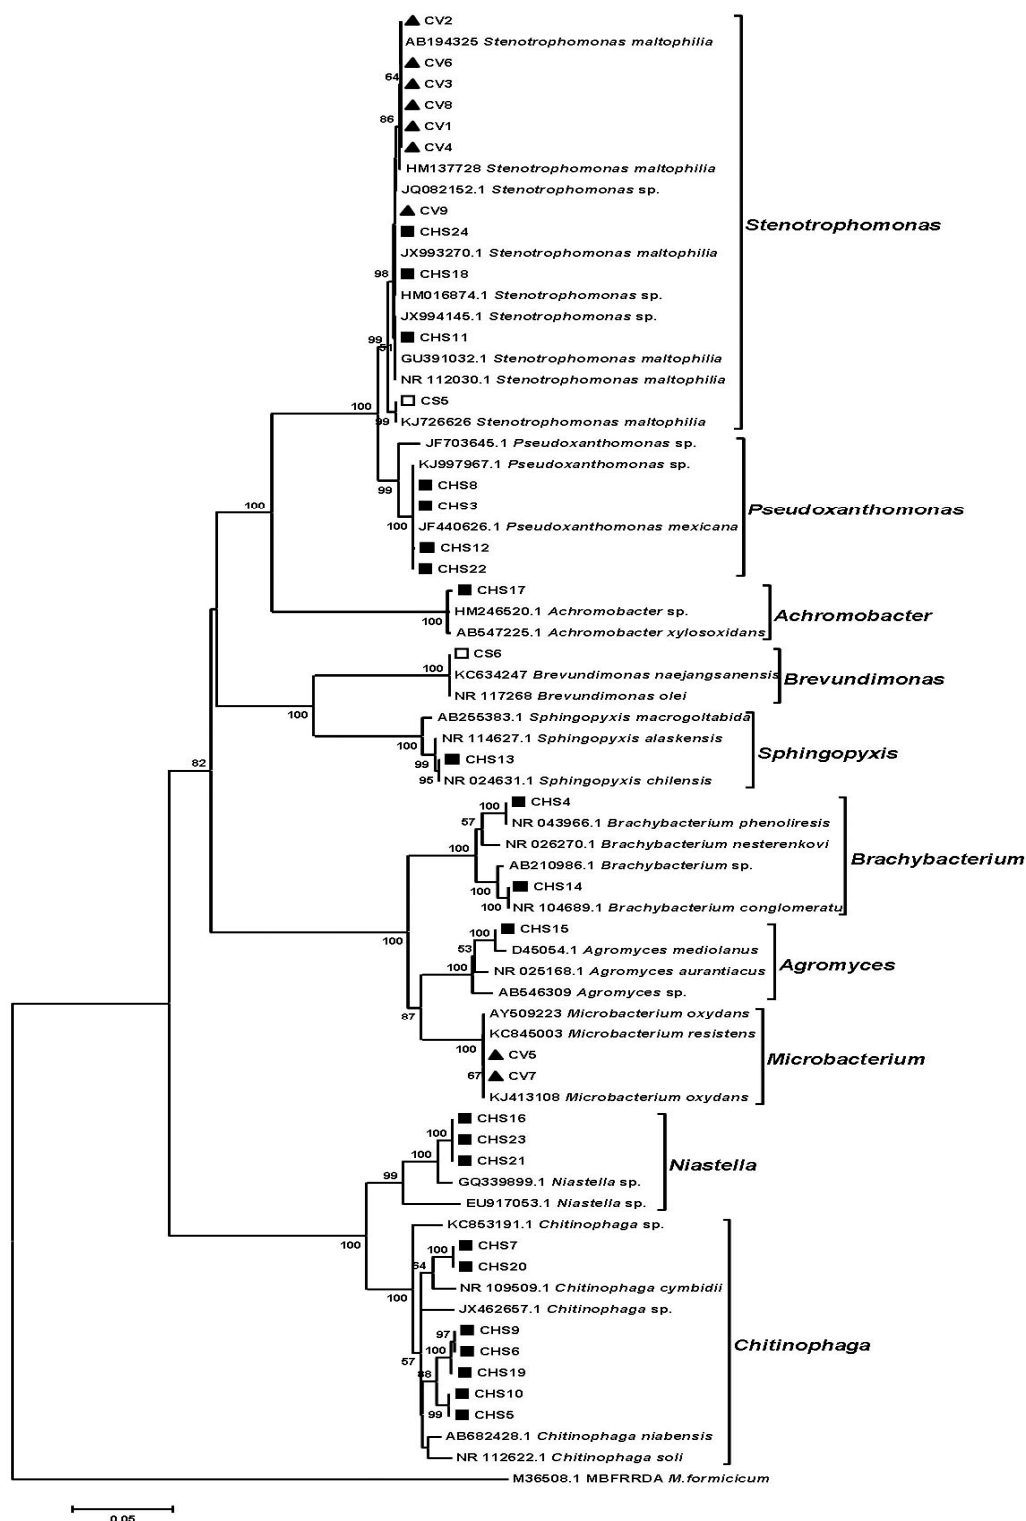

**Figure S1.** Phylogenetic analysis of MARB and MAREB isolated from the control soil and pakchoi. □, MARB from soil before planting; ▲, MAREB from pakchoi; ■, MARB from soil after harvest.

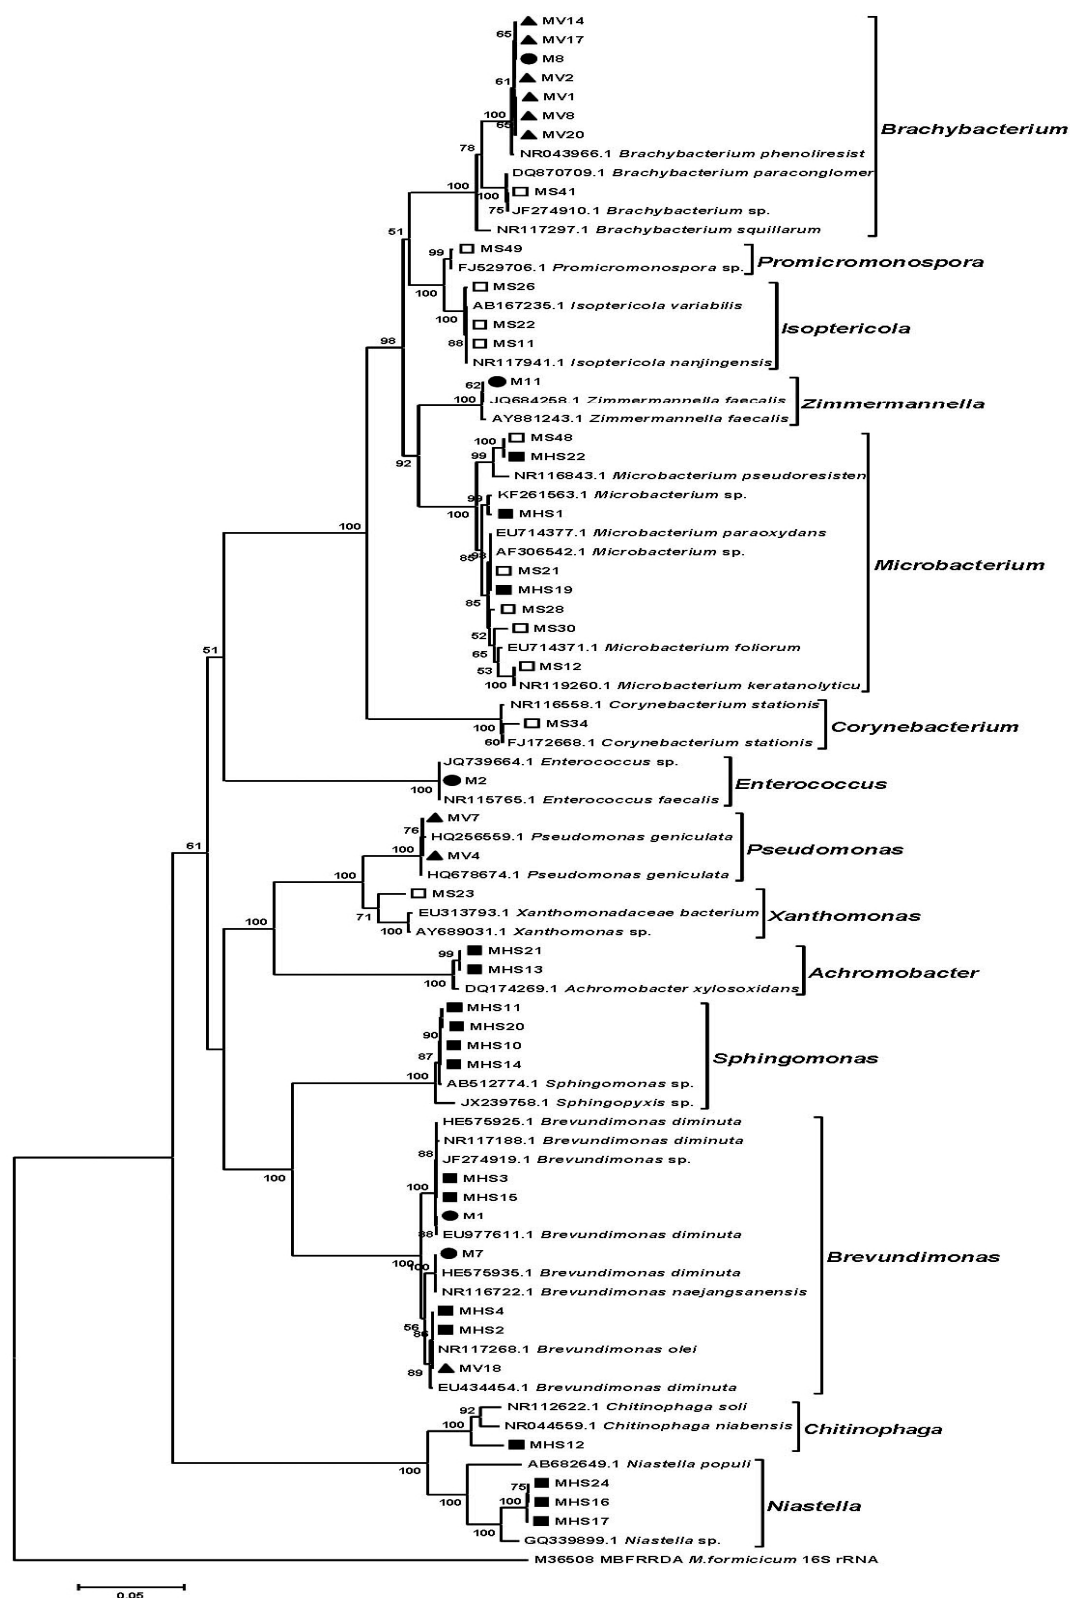

**Figure S2.** Phylogenetic analysis of MARB and MAREB isolated from the CM-amended soil and pakchoi. □, MARB from soil before planting; ▲, MAREB from pakchoi; ■, MARB from soil after harvest; ●, MARB from CM.

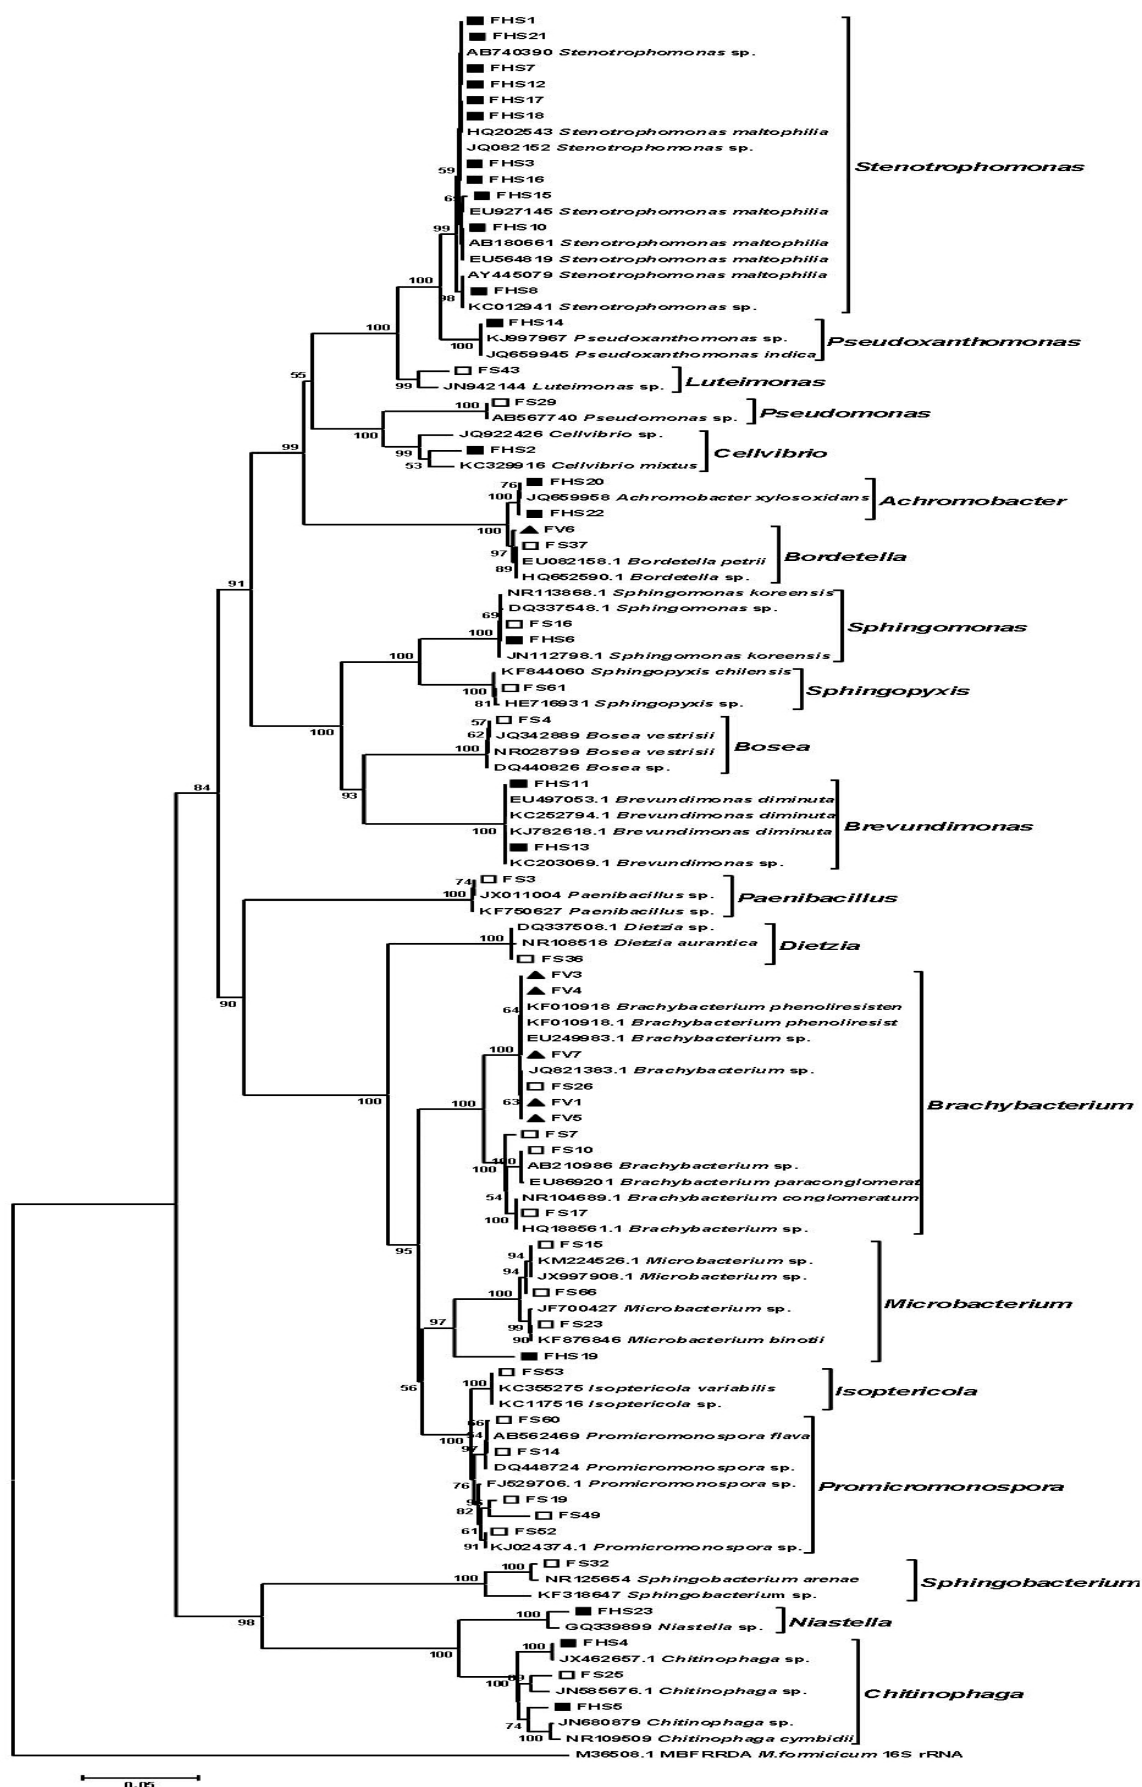

**Figure S3.** Phylogenetic analysis of MARB and MAREB isolated from the COF-amended soil and pakchoi. □, MARB from soil before planting; ▲, MAREB from pakchoi; ■, MARB from soil after harvest.

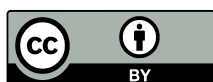

© 2016 by the authors; licensee MDPI, Basel, Switzerland. This article is an open access article distributed under the terms and conditions of the Creative Commons by Attribution (CC-BY) license (<http://creativecommons.org/licenses/by/4.0/>).
